# Supplementary material
Source: Springer Nature journal article supplement (https://www.springermedizin.de/resource/supplementary/12894_2013_249_MOESM2_ESM.pdf/9513300)

# Compliance with SCDs During Hospital Stay

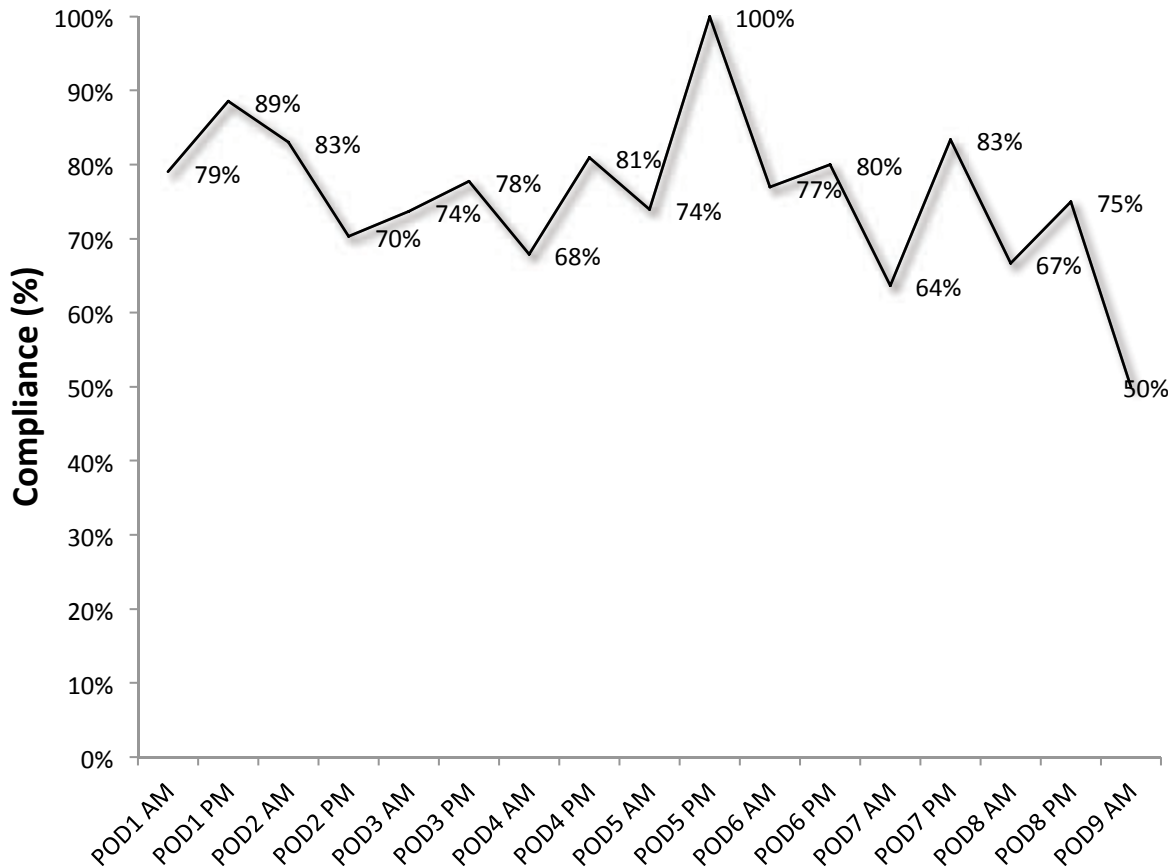

|               |     |    |    |    |    |    |    |    |    |    |    |    |    |   |   |   |   |
|---------------|-----|----|----|----|----|----|----|----|----|----|----|----|----|---|---|---|---|
| Compliant     | 79  | 54 | 49 | 26 | 28 | 21 | 19 | 17 | 17 | 11 | 10 | 8  | 7  | 5 | 4 | 3 | 1 |
| Non-compliant | 21  | 7  | 10 | 11 | 10 | 6  | 9  | 4  | 6  | 0  | 3  | 2  | 4  | 1 | 2 | 1 | 1 |
| Total         | 100 | 61 | 59 | 37 | 38 | 27 | 28 | 21 | 23 | 11 | 13 | 10 | 11 | 6 | 6 | 4 | 2 |

Supplement: MOESM2 [file 9513300]
